# Supplementary material
Source: PubMed Central journal article supplement (PMC6822637)
Supplement: jama-322-1966-s003.pdf [file jama-322-1966-s003.pdf]

Callum J, Farkouh ME, Scales D, et al; FIBRES Research Group. Effect of Fibrinogen Concentrate vs Cryoprecipitate on Blood Component Transfusion after Cardiac Surgery: The FIBRES Randomized Clinical Trial. *JAMA*. doi:10.1001/jama.2019.17312

## **Data Sharing Statement**

### **Data**

**Data available:** No

### **Additional Information**

**Explanation for why data not available:** Consent process did not account for this.
